# Supplementary material for: Functionalized Membrane Domains: An Ancestral Feature of Archaea?
Source: Front Microbiol. 2020 Mar 31;11:526. doi: 10.3389/fmicb.2020.00526 (PMC7137397; doi:10.3389/fmicb.2020.00526)
Supplement: Supplementary file 3 [file Table_2.xlsx]

## Sheet: Feuil1
Species	Genus	Order	Kingdom	Optimal growth conditions			Lipids			Method		Reference
				Temperature (°C)	pH	NaCl (%)	DGD	GDGT	Other structures	Extraction	Analysis
M. bryantii	Methanobacterium	Methanobacteriales	Euryarchaeota Cluster 1	38.0	7.1	0	+	+		NaCl		(Koga et al., 1987)
M. espanolae	Methanobacterium	Methanobacteriales	Euryarchaeota Cluster 1	35.0	5.9	0	+	+		NaCl		(Choquet et al., 1994)
M. formicicum	Methanobacterium	Methanobacteriales	Euryarchaeota Cluster 1	38.0	7.0	2.5	+	+		NaCl		(Koga et al., 1993)
M. lacus	Methanobacterium	Methanobacteriales	Euryarchaeota Cluster 1	30.0	6.5	1.1	+	+		NaCl		(Schirmack et al., 2014)
M. movilense	Methanobacterium	Methanobacteriales	Euryarchaeota Cluster 1	33.0	7.4	0.5	+	ND				(Schirmack et al., 2014)
M. oryzae	Methanobacterium	Methanobacteriales	Euryarchaeota Cluster 1	40.0	7.0	1.2	+	+		NaCl		(Schirmack et al., 2014)
M. palustre	Methanobacterium	Methanobacteriales	Euryarchaeota Cluster 1	35.0	7.0	0.9	+	+		TCA		(Zellner et al., 1989b)
M. arboriphilus	Methanobrevibacter	Methanobacteriales	Euryarchaeota Cluster 1	33.5	7.8	0.2	+	>30.0				(Koga et al., 1993)
M. ruminantium	Methanobrevibacter	Methanobacteriales	Euryarchaeota Cluster 1	38.0	7.2	0.2	+	+		NaCl		(Koga et al., 1993)
M. smithii	Methanobrevibacter	Methanobacteriales	Euryarchaeota Cluster 1	38.0	7.2	0.1	60.0	40.0				(Koga et al., 1993; Sprott et al., 1999)
M. stadtmanae	Methanosphaera	Methanobacteriales	Euryarchaeota Cluster 1	38.0	6.7	0	79.0	13.0	OH-DGD	NaCl		(Choquet et al., 1994; Koga et al., 1993; Sprott et al., 1999)
M. tenebrarum	Methanothermobacter	Methanobacteriales	Euryarchaeota Cluster 1	70.0	7.3	0.2	+	+		AM		(Nakamura et al., 2013)
M. thermautotrophicus	Methanothermobacter	Methanobacteriales	Euryarchaeota Cluster 1	65.0	7.5	0.1	80.0	20.0	GMGT	NaCl		(Knappy et al., 2011; Nishihara and Koga, 1987; Yoshinaga et al., 2015)
M. wolfei	Methanothermobacter	Methanobacteriales	Euryarchaeota Cluster 1	65.0	7.5	1.0	+	+		TCA		(Koga et al., 1993)
M. fervidus	Methanothermus	Methanobacteriales	Euryarchaeota Cluster 1	83.0	6.5	0.6	50.0	25.0	GMGT	NaCl		(Knappy et al., 2011; Koga et al., 1993; Lauerer et al., 1986; Sprott et al., 1997)
M. sociabilis	Methanothermus	Methanobacteriales	Euryarchaeota Cluster 1	88.0	6.5	0	50.0	50.0			ESI+NMR	(Lauerer et al., 1986)
M. jannaschii	Methanocaldococcus	Methanococcales	Euryarchaeota Cluster 1	85.0	6.0	2.5	15.0	42.0	M-DGD	NaCl		(Ferrante et al., 1990; Koga et al., 1993)
M. villosus	Methanocaldococcus	Methanococcales	Euryarchaeota Cluster 1	80.0	6.5	2.5	39.0	4.3	M-DGD, GMGT, GTGT	NaCl+PE		(Baumann et al., 2018)
M. aeolicus	Methanococcus	Methanococcales	Euryarchaeota Cluster 1	46.0	7.0	1.6	+	ND	unsDGD	NaCl		(Koga et al., 1998)
M. maripaludis	Methanococcus	Methanococcales	Euryarchaeota Cluster 1	38.0	7.0	0.6	+	ND	unsDGD	NaCl		(Koga et al., 1998)
M. voltae	Methanococcus	Methanococcales	Euryarchaeota Cluster 1	38.0	6.5	2.3	90.0	ND	unsDGD	NaCl		(Choquet et al., 1992; Koga et al., 1993)
M. okinawensis	Methanothermococcus	Methanococcales	Euryarchaeota Cluster 1	62.5	6.5	2.3	59.0	4.0	OH-DGD, GMGT, GTGT	NaCl		(Baumann et al., 2018)
M. thermolithotrophicus	Methanothermococcus	Methanococcales	Euryarchaeota Cluster 1	65.0	7.0	3.0	+	+	unsDGD, OH-DGD	NaCl		(Koga et al., 1993)
M. formicicus	Methanotorris	Methanococcales	Euryarchaeota Cluster 1	75.0	6.7	2.4	77.0	23.0	OH-DGD, M-DGD	NaCl		(Takai et al., 2004)
M. igneus	Methanotorris	Methanococcales	Euryarchaeota Cluster 1	88.0	5.7	1.8	+	+	OH-DGD, M-DGD	NaCl+PE		(Koga et al., 1998)
M. kandlerii	Methanopyrus	Methanopyrales	Euryarchaeota Cluster 1	98.0	6.5	2.0	+	Traces	unsDGD, diC25	NaCl		(Hafenbradl et al., 1996b; Schouten et al., 2007; Sprott et al., 1997)
P. ferrophilus	Palaeococcus	Thermococcales	Euryarchaeota Cluster 1	83.0	6.0	4.7	42.9	57.5	GTGT	AM/AM	APCI/APCI	(Takai et al., 2000), This study
P. helgesonii	Palaeococcus	Thermococcales	Euryarchaeota Cluster 1	80.0	6.5	2.8	26.0	47.5	GMGT, GTGT	AAB/AM	APCI	This study
P. pacificus	Palaeococcus	Thermococcales	Euryarchaeota Cluster 1	80.0	7.0	3.0	47.7	51.3	GTGT		APCI	This study
P. abyssi	Pyrococcus	Thermococcales	Euryarchaeota Cluster 1	96.0	6.8	3.0	16.5	83.4	GTGT	TCA/AM	APCI	(Erauso et al., 1993), This study
P. endeavori	Pyrococcus	Thermococcales	Euryarchaeota Cluster 1	90.0	7.0	3.0	35.4	64.5	GTGT	AM/AAB	APCI	This study
P. furiosus	Pyrococcus	Thermococcales	Euryarchaeota Cluster 1	100.0	7.0	2.0	39.3	15.1	GMGT, GTGT	AAB/AM	APCI	(Sprott et al., 1997; Sugai et al., 2004), This study
P. glycovorans	Pyrococcus	Thermococcales	Euryarchaeota Cluster 1	95.0	7.5	3.0	34.3	65.3	GTGT	TCA/AM	APCI	This study
P. horikoshii JA1	Pyrococcus	Thermococcales	Euryarchaeota Cluster 1	98.0	7.0	2.4	8.2	70.1	GMGT, GTGT	AM	APCI	This study
P. horikoshii OT3	Pyrococcus	Thermococcales	Euryarchaeota Cluster 1	98.0	7.0	2.4	9.1	64.3	GMGT, GTGT	AM	APCI	(González et al., 1998; Sugai et al., 2004), This study
P. kukulkanii	Pyrococcus	Thermococcales	Euryarchaeota Cluster 1	105.0	7.0	3.0	33.3	66.0	GMGT, GTGT	AM	APCI	(Callac et al., 2016; Takai et al., 2000) This study
P. woesei	Pyrococcus	Thermococcales	Euryarchaeota Cluster 1	100.0	6.5	3.0	32.4	65.4	GMGT, GTGT	AM	APCI	(Lanzotti et al., 1989; Sugai et al., 2004), This study
P. yayanosii	Pyrococcus	Thermococcales	Euryarchaeota Cluster 1	98.0	6.8	3.0	+	+		AM	APCI	This study
T. acidaminovorans	Thermococcus	Thermococcales	Euryarchaeota Cluster 1	85.0	9.0	3.0	49.6	49.0	GMGT, GTGT	AAB/AM	APCI	(Dirmeier et al., 1998), This study
T. aegaeus	Thermococcus	Thermococcales	Euryarchaeota Cluster 1	90.0	6.0	2.0	60.1	36.8	GTGT	AAB/AM	TLC+GLC/APCI	(Sugai et al., 2004), This study
T. aggregans	Thermococcus	Thermococcales	Euryarchaeota Cluster 1	88.0	7.0	2.5	57.2	42.1	GTGT	AM	APCI	(Sugai et al., 2004), This study
T. alcaliphilus	Thermococcus	Thermococcales	Euryarchaeota Cluster 1	85.0	9.0	3.0	61.5	38.0	GTGT	AM	APCI	(Huber et al., 1995a), This study
T. atlanticus	Thermococcus	Thermococcales	Euryarchaeota Cluster 1	85.0	7.0	3.0	30.3	66.6	GMGT, GTGT	AAB/AM	TLC+GLC/APCI	This study
T. barophilus CH1	Thermococcus	Thermococcales	Euryarchaeota Cluster 1	85.0	6.8	3.0	52.9	44.5	GTGT	AAB/AM	APCI/APCI	This study
T. barophilus CH5	Thermococcus	Thermococcales	Euryarchaeota Cluster 1	88.0	6.8	3.0	36.4	61.9	GTGT	AM	APCI	This study
T. barophilus MP	Thermococcus	Thermococcales	Euryarchaeota Cluster 1	85.0	6.8	3.0	55.1	44.3	GTGT	AAB/AM	APCI	(Cario et al., 2015; Marteinsson et al., 1999), This study
T. barossii	Thermococcus	Thermococcales	Euryarchaeota Cluster 1	83.0	7.0	3.0	53.9	45.2	GTGT	AM	APCI	This study
T. celer	Thermococcus	Thermococcales	Euryarchaeota Cluster 1	88.0	5.8	4.0	60.1	37.4	GMGT, GTGT	AM	APCI/APCI	(De Rosa et al., 1987; Sugai et al., 2004), This study
T. celericrescens	Thermococcus	Thermococcales	Euryarchaeota Cluster 1	80.0	7.0	3.0	69.0	30.4	GTGT	AAB/TCA/AM	TLC+ESI/ESI/APCI	(Kuwabara et al., 2007), This study
T. chitonophagus	Thermococcus	Thermococcales	Euryarchaeota Cluster 1	85.0	6.7	2.0	54.7	45.0	GTGT	AAB/AM	APCI	(Huber et al., 1995b), This study
T. cleftensis	Thermococcus	Thermococcales	Euryarchaeota Cluster 1	82.0	8.0	3.0	60.8	38.8	GTGT	AM	APCI	This study
T. coalescens	Thermococcus	Thermococcales	Euryarchaeota Cluster 1	87.0	6.5	2.5	79.9	19.9	GTGT	AM	APCI	(Kuwabara et al., 2005), This study
T. fumicolans	Thermococcus	Thermococcales	Euryarchaeota Cluster 1	85.0	8.5	3.0	42.0	57.9	GTGT	AM	APCI	(Godfroy et al., 1996; Sugai et al., 2004), This study
T. gammatolerans	Thermococcus	Thermococcales	Euryarchaeota Cluster 1	88.0	6.0	2.0	55.8	43.6	GTGT	AAB/AM	APCI	This study
T. gorgonarius	Thermococcus	Thermococcales	Euryarchaeota Cluster 1	88.0	6.8	3.0	80.0	19.8	GMGT, GTGT	Unpublished/AM	APCI	(Sugai et al., 2004), This study
T. guaymasensis	Thermococcus	Thermococcales	Euryarchaeota Cluster 1	88.0	7.2	3.0	51.7	44.3	GMGT, GTGT	AAB/AM	APCI	This study
T. hydrothermalis	Thermococcus	Thermococcales	Euryarchaeota Cluster 1	85.0	6.0	3.0	56.6	42.6	GTGT	AM	APCI	(Godfroy et al., 1997; Lattuati et al., 1998), This study
T. kodakarensis	Thermococcus	Thermococcales	Euryarchaeota Cluster 1	85.0	7.0	3.0	68.1	31.5	GTGT	AM	APCI	(Bauersachs et al., 2015; Matsuno et al., 2009; Meador et al., 2014; Morikawa et al., 1994), This study
T. litoralis	Thermococcus	Thermococcales	Euryarchaeota Cluster 1	85.0	6.0	3.0	62.4	37.3	GTGT	AAB/AM	APCI	(Sugai et al., 2004), This study
T. marinus	Thermococcus	Thermococcales	Euryarchaeota Cluster 1	88.0	6.0	2.0	70.9	29.0	GTGT	AM	APCI	This study
T. nautili	Thermococcus	Thermococcales	Euryarchaeota Cluster 1	88.0	7.0	2.0	71.1	28.6	GTGT	AM	APCI	This study
T. onnurineus	Thermococcus	Thermococcales	Euryarchaeota Cluster 1	80.0	8.5	3.5	65.2	33.1	GTGT	AM	APCI	This study
T. pacificus	Thermococcus	Thermococcales	Euryarchaeota Cluster 1	85.0	7.0	3.0	59.1	40.6	GTGT	AM	APCI	(Sugai et al., 2004), This study
T. paralvinellae	Thermococcus	Thermococcales	Euryarchaeota Cluster 1	82.0	8.0	3.2	62.3	35.7	GTGT	AM	APCI	(Hensley et al., 2014), This study
T. peptonophilus	Thermococcus	Thermococcales	Euryarchaeota Cluster 1	85.0	6.0	3.0	59.2	39.7	GMGT, GTGT	AM	APCI	(Sugai et al., 2004), This study
T. piezophilus	Thermococcus	Thermococcales	Euryarchaeota Cluster 1	80.0	6.0	3.0	65.7	33.1	GTGT	AAB/AM	APCI	This study
T. prieurii	Thermococcus	Thermococcales	Euryarchaeota Cluster 1	80.0	7.0	2.0	42.0	57.5	GMGT, GTGT	AM	APCI	This study
T. profundus	Thermococcus	Thermococcales	Euryarchaeota Cluster 1	80.0	7.0	3.0	39.1	60.7	GMGT, GTGT	AAB/AM	APCI	(Sugai et al., 2004), This study
T. radiotolerans	Thermococcus	Thermococcales	Euryarchaeota Cluster 1	88.0	6.0	2.0	45.6	51.5	GMGT, GTGT	AAB/AM	APCI	This study
T. sibiricus	Thermococcus	Thermococcales	Euryarchaeota Cluster 1	78.0	7.3	2.0	44.3	55.5	GTGT	NaCl	TLC+MALDI	This study
T. siculi	Thermococcus	Thermococcales	Euryarchaeota Cluster 1	85.0	7.0	3.0	38.9	59.9	GMGT, GTGT	PB	ESI	(Grote et al., 1999), This study
T. sp AM4	Thermococcus	Thermococcales	Euryarchaeota Cluster 1	82.0	6.8	3.0	59.1	39.9	GTGT	AM	TLC+MALDI	This study
T. sp DT4	Thermococcus	Thermococcales	Euryarchaeota Cluster 1	85.0	6.8	3.0	50.6	47.8	GTGT		FAB/TLC+MALDI	This study
T. sp P6	Thermococcus	Thermococcales	Euryarchaeota Cluster 1	85.0	6.8	3.0	39.8	59.7	GMGT, GTGT	AAB+TCA		This study
T. stetteri	Thermococcus	Thermococcales	Euryarchaeota Cluster 1	85.0	6.5	2.5	35.6	63.3	GTGT	PB	APCI	(Sugai et al., 2004), This study
T. thioreducens	Thermococcus	Thermococcales	Euryarchaeota Cluster 1	85.0	7.0	3.0	71.1	28.1	GTGT			This study
T. waiotapuensis	Thermococcus	Thermococcales	Euryarchaeota Cluster 1	85.0	7.0	0.6	36.4	22.1	GMGT, GTGT	AM	TLC+ESI+GC+NMR	(Sugai et al., 2004), This study
T. zilligii	Thermococcus	Thermococcales	Euryarchaeota Cluster 1	80.0	7.4	0.3	42.5	56.8	GTGT	AAB		(Sugai et al., 2004), This study
A. fulgidus	Archaeoglobus	Archaeoglobales	Euryarchaeota Cluster 2	76.0	6.9	1.7	60.0	40.0			APCI	(Lai et al., 2008; Trincone et al., 1992)
A. profundus	Archaeoglobus	Archaeoglobales	Euryarchaeota Cluster 2	82.0	6.0	2.3	+	+		TCA	TLC+ESI/APCI	(Burggraf et al., 1990; Trincone et al., 1992)
F. placidus	Ferroglobus	Archaeoglobales	Euryarchaeota Cluster 2	85.0	7.0	2.0	+	+			TLC+ESI	(Hafenbradl et al., 1996a)
A. boonei	Aciduliprofundum	Diaforarchaea (Aciduliprofundales)	Euryarchaeota Cluster 2	70.0	4.5	3.0	Traces	+	GMGT	TCA		(Knappy et al., 2011; Schouten et al., 2008)
M. lumyniensis	Methanomassiliicoccus	Diaforarchaea (Methanomassilicoccales)	Euryarchaeota Cluster 2	37.0	7.6	0.8	2.0	5.0	C25, diC25, BGDT, PGDT	NaCl		(Becker et al., 2016)
A. aeolicum	Acidiplasma	Diaforarchaea (Thermoplasmatales)	Euryarchaeota Cluster 2	45.0	1.5	0	NA	+		NaCl		(Golyshina et al., 2009)
C. divulgatum	Cuniculiplasma	Diaforarchaea (Thermoplasmatales)	Euryarchaeota Cluster 2	38.5	1.1	0	4.5	87.0	unsDGD, OH-DGD, GMGT, GTGT	B&D + PB		(Golyshina et al., 2016)
F. acidarmanus	Ferroplasma	Diaforarchaea (Thermoplasmatales)	Euryarchaeota Cluster 2	35.0	1.7	0	Traces	+		NaCl		(Macalady et al., 2004)
F. acidiphilum	Ferroplasma	Diaforarchaea (Thermoplasmatales)	Euryarchaeota Cluster 2	42.0	1.2	0	Traces	+		NaCl		(Golyshina et al., 2000; Macalady et al., 2004)
P. oshimae	Picrophilus	Diaforarchaea (Thermoplasmatales)	Euryarchaeota Cluster 2	58.0	0.7	0	+	+		NaCl		(Schleper et al., 1995; Uda et al., 2004)
P. torridus	Picrophilus	Diaforarchaea (Thermoplasmatales)	Euryarchaeota Cluster 2	60.0	0.7	0	+	+	GTGT	NaCl		(Feyhl-Buska et al., 2016; Schleper et al., 1995)
T. acidicola	Thermogymnomonas	Diaforarchaea (Thermoplasmatales)	Euryarchaeota Cluster 2	60.0	3.0	0	ND	+		NaCl		(Itoh et al., 2007)
T. acidophilum	Thermoplasma	Diaforarchaea (Thermoplasmatales)	Euryarchaeota Cluster 2	59.0	1.5	2.0	Traces	+			APCI	(Langworthy and Pond, 1986; Shimada et al., 2002)
T. volcanium	Thermoplasma	Diaforarchaea (Thermoplasmatales)	Euryarchaeota Cluster 2	60.0	2.0	2.0	Traces	+		NaCl+PE		(Uda et al., 2004)
M. thermophilum (C)	Methanohalarchaeum (C)	Methanonatronoarchaeales	Euryarchaeota Cluster 2	50.0	9.5	23.5	25.0	75.0		AM		(Sorokin et al., 2018b)
M. thermophilum	Methanonatronoarchaeum	Methanonatronoarchaeales	Euryarchaeota Cluster 2	50.0	9.5	23.5	50.0	50.0		NaCl		(Sorokin et al., 2018b)
H. cibarius	Haladaptatus	Stenosarchaea (Halobacteria > Halobacteriales)	Euryarchaeota Cluster 2	37.0	7.0	15.0	+	ND		B&D + NaCl		(Roh et al., 2010)
H. litoreus	Haladaptatus	Stenosarchaea (Halobacteria > Halobacteriales)	Euryarchaeota Cluster 2	38.5	7.0	20.0	+	ND		B&D + H2O		(Cui et al., 2010e)
H. pallidirubidus	Haladaptatus	Stenosarchaea (Halobacteria > Halobacteriales)	Euryarchaeota Cluster 2	40.0	7.3	18.1	+	ND		B&D + NaCl		(Liu et al., 2014)
H. paucihalophilus	Haladaptatus	Stenosarchaea (Halobacteria > Halobacteriales)	Euryarchaeota Cluster 2	30.0	6.0	18.1	+	ND				(Savage et al., 2007)
H. jeotgali	Halalkalicoccus	Stenosarchaea (Halobacteria > Halobacteriales)	Euryarchaeota Cluster 2	41.0	7.0	15.0	+	ND		PE		(Liu et al., 2013b; Roh et al., 2007b)
H. paucihalophilus	Halalkalicoccus	Stenosarchaea (Halobacteria > Halobacteriales)	Euryarchaeota Cluster 2	37.0	7.0	22.5	+	ND		B&D + NaCl		(Liu et al., 2013b)
H. tibetensis	Halalkalicoccus	Stenosarchaea (Halobacteria > Halobacteriales)	Euryarchaeota Cluster 2	40.0	9.8	20.0	+	ND	C25	B&D + NaCl		(Xue et al., 2005)
H. sulfurireducens	Halanaeroarchaeum	Stenosarchaea (Halobacteria > Halobacteriales)	Euryarchaeota Cluster 2	38.0	7.3	23.3	+	ND		NaCl		(Bale et al., 2019; Sorokin et al., 2016)
H. salinum	Halapricum	Stenosarchaea (Halobacteria > Halobacteriales)	Euryarchaeota Cluster 2	37.0	7.0	20.0	+	ND		NaCl		(Song et al., 2014)
H. acidiphilum	Halarchaeum	Stenosarchaea (Halobacteria > Halobacteriales)	Euryarchaeota Cluster 2	37.0	4.4	22.5	+	ND	C25	B&D + NaCl		(Minegishi et al., 2010)
H. grantii	Halarchaeum	Stenosarchaea (Halobacteria > Halobacteriales)	Euryarchaeota Cluster 2	45.0	5.5	24.0	+	ND	C25	B&D + NaCl		(Shimane et al., 2015)
H. nitratireducens	Halarchaeum	Stenosarchaea (Halobacteria > Halobacteriales)	Euryarchaeota Cluster 2	45.0	5.4	21.0	+	ND	C25	B&D + NaCl		(Minegishi et al., 2013; Shimane et al., 2015)
H. rubridurum	Halarchaeum	Stenosarchaea (Halobacteria > Halobacteriales)	Euryarchaeota Cluster 2	42.0	5.5	18.1	+	ND	C25			(Shimane et al., 2015; Yamauchi et al., 2013)
H. salinum	Halarchaeum	Stenosarchaea (Halobacteria > Halobacteriales)	Euryarchaeota Cluster 2	42.0	5.4	18.1	+	ND	C25	B&D + NaCl		(Shimane et al., 2015; Yamauchi et al., 2013)
H. solikamskense	Halarchaeum	Stenosarchaea (Halobacteria > Halobacteriales)	Euryarchaeota Cluster 2	40.0	7.1	21.0	+	ND	C25	NaCl		(Saralov et al., 2012)
H. amylolyticus	Haloarchaeobius	Stenosarchaea (Halobacteria > Halobacteriales)	Euryarchaeota Cluster 2	37.0	6.5	18.1	+	ND		AM/NaCl		(Yuan et al., 2015a)
H. baliensis	Haloarchaeobius	Stenosarchaea (Halobacteria > Halobacteriales)	Euryarchaeota Cluster 2	43.0	6.8	15.2	+	ND		NaCl		(Mori et al., 2016a)
H. iranensis	Haloarchaeobius	Stenosarchaea (Halobacteria > Halobacteriales)	Euryarchaeota Cluster 2	40.0	7.5	20.4	+	ND				(Makhdoumi-Kakhki et al., 2012a; Yuan et al., 2015a)
H. litoreus	Haloarchaeobius	Stenosarchaea (Halobacteria > Halobacteriales)	Euryarchaeota Cluster 2	37.0	7.0	15.2	+	ND		B&D + NaCl		(Yuan et al., 2015a; Zhang and Cui, 2014b)
H. salinus	Haloarchaeobius	Stenosarchaea (Halobacteria > Halobacteriales)	Euryarchaeota Cluster 2	37.0	7.5	11.7	+	ND				(Yuan et al., 2015e)
H. amylolytica	Haloarcula	Stenosarchaea (Halobacteria > Halobacteriales)	Euryarchaeota Cluster 2	41.0	7.3	18.1	+	ND		NaCl		(Yang et al., 2007)
H. argentinensis	Haloarcula	Stenosarchaea (Halobacteria > Halobacteriales)	Euryarchaeota Cluster 2	40.0	7.5	16.0	+	ND		NaCl		(Ihara et al., 1997)
H. californiae	Haloarcula	Stenosarchaea (Halobacteria > Halobacteriales)	Euryarchaeota Cluster 2	40.0	7.4	25.0	+	ND		NaCl		(Torreblanca et al., 1986)
H. hispanica	Haloarcula	Stenosarchaea (Halobacteria > Halobacteriales)	Euryarchaeota Cluster 2	45.0	7.0	20.0	+	ND		NaCl		(Juez et al., 1986)
H. japonica	Haloarcula	Stenosarchaea (Halobacteria > Halobacteriales)	Euryarchaeota Cluster 2	43.5	7.3	20.0	+	ND		NaCl		(Takashina et al., 1990)
H. marismortui	Haloarcula	Stenosarchaea (Halobacteria > Halobacteriales)	Euryarchaeota Cluster 2	45.0	7.0	20.0	+	ND		NaCl		(de Souza et al., 2009)
H. quadrata	Haloarcula	Stenosarchaea (Halobacteria > Halobacteriales)	Euryarchaeota Cluster 2	51.5	6.8	22.5	+	ND		B&D + NaCl		(Oren et al., 1999)
H. salaria	Haloarcula	Stenosarchaea (Halobacteria > Halobacteriales)	Euryarchaeota Cluster 2	37.0	7.0	22.5	+	ND		B&D + NaCl + Petroleum ether		(Namwong et al., 2011)
H. sinaiensis	Haloarcula	Stenosarchaea (Halobacteria > Halobacteriales)	Euryarchaeota Cluster 2	40.0	7.4	25.0	+	ND		PE		(Torreblanca et al., 1986)
H. tradensis	Haloarcula	Stenosarchaea (Halobacteria > Halobacteriales)	Euryarchaeota Cluster 2	37.0	7.0	22.5	+	ND		PE		(Namwong et al., 2011)
H. vallismortis	Haloarcula	Stenosarchaea (Halobacteria > Halobacteriales)	Euryarchaeota Cluster 2	40.0	7.4	25.0	+	ND			APCI	(Torreblanca et al., 1986)
H. jilantaiense	Halobacterium	Stenosarchaea (Halobacteria > Halobacteriales)	Euryarchaeota Cluster 2	40.0	7.3	19.0	+	ND		B&D + NaCl		(Yang et al., 2006)
H. litoreum	Halobacterium	Stenosarchaea (Halobacteria > Halobacteriales)	Euryarchaeota Cluster 2	35.0	7.0	22.7	+	ND		NaCl		(Lü et al., 2017)
H. noricense	Halobacterium	Stenosarchaea (Halobacteria > Halobacteriales)	Euryarchaeota Cluster 2	45.0	8.1	17.5	+	ND				(Gruber et al., 2004)
H. rubrum	Halobacterium	Stenosarchaea (Halobacteria > Halobacteriales)	Euryarchaeota Cluster 2	36.0	7.3	18.1	+	ND		NaCl		(Han and Cui, 2014a)
H. salinarum	Halobacterium	Stenosarchaea (Halobacteria > Halobacteriales)	Euryarchaeota Cluster 2	45.0	7.0	17.5	+	ND		B&D + NaCl		(Gruber et al., 2004)
H. aciditolerans	Halocalculus	Stenosarchaea (Halobacteria > Halobacteriales)	Euryarchaeota Cluster 2	40.0	6.0	18.1	+	ND	C25	NaCl		(Minegishi et al., 2015b)
H. agarilyticus	Halococcus	Stenosarchaea (Halobacteria > Halobacteriales)	Euryarchaeota Cluster 2	42.0	7.5	27.0	+	ND	C25	NaCl		(Minegishi et al., 2015a)
H. dombrowskii	Halococcus	Stenosarchaea (Halobacteria > Halobacteriales)	Euryarchaeota Cluster 2	38.0	7.0	25.0	+	ND	C25	NaCl		(Stan-Lotter et al., 2002)
H. hamelinensis	Halococcus	Stenosarchaea (Halobacteria > Halobacteriales)	Euryarchaeota Cluster 2	37.0	7.0	15.0	+	ND	C25	NaCl		(Goh et al., 2006)
H. qingdaonensis	Halococcus	Stenosarchaea (Halobacteria > Halobacteriales)	Euryarchaeota Cluster 2	37.5	6.0	20.0	+	ND	C25	B&D + NaCl		(Wang et al., 2007)
H. saccharolyticus	Halococcus	Stenosarchaea (Halobacteria > Halobacteriales)	Euryarchaeota Cluster 2	37.0	6.2	25.0	+	ND	C25	B&D + NaCl		(Montero et al., 1989)
H. salifodinae	Halococcus	Stenosarchaea (Halobacteria > Halobacteriales)	Euryarchaeota Cluster 2	40.0	7.0	22.5	+	ND	C25			(Denner et al., 1994)
H. salsus	Halococcus	Stenosarchaea (Halobacteria > Halobacteriales)	Euryarchaeota Cluster 2	39.0	7.5	20.0	+	ND		NaCl		(Chen et al., 2018)
H. sediminicola	Halococcus	Stenosarchaea (Halobacteria > Halobacteriales)	Euryarchaeota Cluster 2	37.5	7.0	20.0	+	ND	C25	B&D + H2O + Petroleum ether		(Yim et al., 2014b)
H. thailandensis	Halococcus	Stenosarchaea (Halobacteria > Halobacteriales)	Euryarchaeota Cluster 2	37.0	7.0	35	+	ND	C25			(Namwong et al., 2007)
H. formicicum	Halodesulfurarchaeum	Stenosarchaea (Halobacteria > Halobacteriales)	Euryarchaeota Cluster 2	37.0	7.1	22.0	+	ND	C25			(Bale et al., 2019; Sorokin et al., 2017)
H. oriensis	Halomarina	Stenosarchaea (Halobacteria > Halobacteriales)	Euryarchaeota Cluster 2	37.0	7.5	16.0	+	ND	C25	NaCl		(Inoue et al., 2011)
H. rubra	Halomarina	Stenosarchaea (Halobacteria > Halobacteriales)	Euryarchaeota Cluster 2	37.0	7.0	20.0	+	ND	C25	B&D + H2O		(Zhou et al., 2017)
H. salina	Halomarina	Stenosarchaea (Halobacteria > Halobacteriales)	Euryarchaeota Cluster 2	30.0	7.0	22.8	+	ND	C25	NaCl		(Xu et al., 2016b)
H. limicola	Halomicroarcula	Stenosarchaea (Halobacteria > Halobacteriales)	Euryarchaeota Cluster 2	37.0	7.5	12.2	+	ND		TCA		(Zhang and Cui, 2014c)
H. pellucida	Halomicroarcula	Stenosarchaea (Halobacteria > Halobacteriales)	Euryarchaeota Cluster 2	40.0	7.0	25.0	+	ND		B&D + NaCl		(Echigo et al., 2013)
H. salina	Halomicroarcula	Stenosarchaea (Halobacteria > Halobacteriales)	Euryarchaeota Cluster 2	37.0	7.0	12.2	+	ND				(Zhang and Cui, 2015)
H. katesii	Halomicrobium	Stenosarchaea (Halobacteria > Halobacteriales)	Euryarchaeota Cluster 2	38.5	7.3	25.0	+	ND		TCA		(Boulahrouf et al., 2008)
H. mukohataei	Halomicrobium	Stenosarchaea (Halobacteria > Halobacteriales)	Euryarchaeota Cluster 2	40.0	7.5	19.3	+	ND		AM/NaCl	TLC+ESI	(Ihara et al., 1997; Oren et al., 2002)
H. zhouii	Halomicrobium	Stenosarchaea (Halobacteria > Halobacteriales)	Euryarchaeota Cluster 2	42.0	7.0	15.1	+	ND		TCA		(Yang and Cui, 2012)
H. rudnickae	Halorhabdus	Stenosarchaea (Halobacteria > Halobacteriales)	Euryarchaeota Cluster 2	40.0	7.0	20.0	+	ND		B&D + H2O		(Albuquerque et al., 2016)
H. tiamatea	Halorhabdus	Stenosarchaea (Halobacteria > Halobacteriales)	Euryarchaeota Cluster 2	45.0	6.8	27.0	+	ND				(Antunes et al., 2008)
H. utahensis	Halorhabdus	Stenosarchaea (Halobacteria > Halobacteriales)	Euryarchaeota Cluster 2	50.0	6.9	27.0	+	ND				(Wainø et al., 2000)
H. brevis	Halorientalis	Stenosarchaea (Halobacteria > Halobacteriales)	Euryarchaeota Cluster 2	37.0	7.5	16.3	+	ND		B&D + H2O		(Yuan et al., 2015d)
H. persicus	Halorientalis	Stenosarchaea (Halobacteria > Halobacteriales)	Euryarchaeota Cluster 2	40.0	7.5	25.0	+	ND				(Amoozegar et al., 2014a)
H. regularis	Halorientalis	Stenosarchaea (Halobacteria > Halobacteriales)	Euryarchaeota Cluster 2	37.0	7.3	19.3	+	ND		NaCl		(Cui et al., 2011c)
H. litoreus	Halorubellus	Stenosarchaea (Halobacteria > Halobacteriales)	Euryarchaeota Cluster 2	37.0	7.0	18.1	+	ND		NaCl		(Cui et al., 2012a)
H. salinus	Halorubellus	Stenosarchaea (Halobacteria > Halobacteriales)	Euryarchaeota Cluster 2	37.0	7.0	18.1	+	ND		NaCl+PE		(Cui et al., 2012a)
H. amylolyticus	Halorussus	Stenosarchaea (Halobacteria > Halobacteriales)	Euryarchaeota Cluster 2	37.0	7.0	11.7	+	ND				(Yuan et al., 2015c)
H. litoreus	Halorussus	Stenosarchaea (Halobacteria > Halobacteriales)	Euryarchaeota Cluster 2	30.0	7.0	18.1	+	ND		M+T		(Han et al., 2019)
H. rarus	Halorussus	Stenosarchaea (Halobacteria > Halobacteriales)	Euryarchaeota Cluster 2	37.0	7.0	12.2	+	ND		B&D + H2O		(Cui et al., 2010c)
H. ruber	Halorussus	Stenosarchaea (Halobacteria > Halobacteriales)	Euryarchaeota Cluster 2	37.0	6.5	9.9	+	ND		B&D + H2O		(Xu et al., 2015)
H. salinus	Halorussus	Stenosarchaea (Halobacteria > Halobacteriales)	Euryarchaeota Cluster 2	37.0	7.0	15.2	+	ND		NaCl		(Xu et al., 2016a)
H. urmianus	Halosiccatus	Stenosarchaea (Halobacteria > Halobacteriales)	Euryarchaeota Cluster 2	45.0	7.5	23.3	+	ND				(Mehrshad et al., 2016)
H. carlsbadense	Halosimplex	Stenosarchaea (Halobacteria > Halobacteriales)	Euryarchaeota Cluster 2	40.0	7.5	25.0	+	ND				(Vreeland et al., 2002)
H. litoreum	Halosimplex	Stenosarchaea (Halobacteria > Halobacteriales)	Euryarchaeota Cluster 2	40.0	7.5	18.1	+	ND		B&D + H2O		(Yuan et al., 2015b)
H. pelagicum	Halosimplex	Stenosarchaea (Halobacteria > Halobacteriales)	Euryarchaeota Cluster 2	42.0	7.0	18.1	+	ND		B&D + H2O		(Han and Cui, 2014c)
H. rubrum	Halosimplex	Stenosarchaea (Halobacteria > Halobacteriales)	Euryarchaeota Cluster 2	42.0	7.0	18.1	+	ND		B&D + H2O		(Han and Cui, 2014c)
H. salina	Halostella	Stenosarchaea (Halobacteria > Halobacteriales)	Euryarchaeota Cluster 2	40.0	8.0	20.0	+	ND		B&D + H2O + Petroleum ether		(Song et al., 2016)
H. aranensis	Halovenus	Stenosarchaea (Halobacteria > Halobacteriales)	Euryarchaeota Cluster 2	40.0	7.5	23.3	+	ND				(Infante-Domínguez et al., 2015; Makhdoumi-Kakhki et al., 2012b)
H. rubra	Halovenus	Stenosarchaea (Halobacteria > Halobacteriales)	Euryarchaeota Cluster 2	42.0	7.3	22.7	+	ND		NaCl		(Han et al., 2015)
H. salina	Halovenus	Stenosarchaea (Halobacteria > Halobacteriales)	Euryarchaeota Cluster 2	37.0	7.5	25.0	+	ND		B&D + NaCl		(Infante-Domínguez et al., 2015)
N. mannanilyticum	Natronoarchaeum	Stenosarchaea (Halobacteria > Halobacteriales)	Euryarchaeota Cluster 2	37.0	8.5	24.8	+	ND		B&D		(Shimane et al., 2010)
N. persicum	Natronoarchaeum	Stenosarchaea (Halobacteria > Halobacteriales)	Euryarchaeota Cluster 2	38.0	7.0	20.0	+	ND		NaCl		(Naghoni et al., 2017)
N. philippinense	Natronoarchaeum	Stenosarchaea (Halobacteria > Halobacteriales)	Euryarchaeota Cluster 2	42.0	8.0	18.1	+	ND	C25	NaCl		(Shimane et al., 2013)
N. rubrum	Natronoarchaeum	Stenosarchaea (Halobacteria > Halobacteriales)	Euryarchaeota Cluster 2	37.0	7.0	15.2	+	ND		NaCl		(Qiu et al., 2014)
N. gomsonensis	Natronomonas	Stenosarchaea (Halobacteria > Halobacteriales)	Euryarchaeota Cluster 2	40.0	7.0	24.0	+	ND	C25	B&D + H2O		(Kim et al., 2013)
N. moolapensis	Natronomonas	Stenosarchaea (Halobacteria > Halobacteriales)	Euryarchaeota Cluster 2	38.5	7.3	19.0	+	ND	C25			(Burns et al., 2010b)
N. pharaonis	Natronomonas	Stenosarchaea (Halobacteria > Halobacteriales)	Euryarchaeota Cluster 2	45.0	8.5	20.0	+	ND	C25			(Kamekura et al., 1997; Langworthy and Pond, 1986)
S. japonicum	Salarchaeum	Stenosarchaea (Halobacteria > Halobacteriales)	Euryarchaeota Cluster 2	40.0	5.7	16.0	+	ND		NaCl		(Shimane et al., 2011)
S. litoreum	Salinarubrum	Stenosarchaea (Halobacteria > Halobacteriales)	Euryarchaeota Cluster 2	37.0	7.0	15.2	+	ND			FAB	(Cui and Qiu, 2014)
S. salinus	Salinirubellus	Stenosarchaea (Halobacteria > Halobacteriales)	Euryarchaeota Cluster 2	37.0	7.5	12.2	+	ND	C25			(Hou et al., 2018)
S. salinus	Salinirussus	Stenosarchaea (Halobacteria > Halobacteriales)	Euryarchaeota Cluster 2	37.0	7.0	19.8	+	ND		M+T		(Cui et al., 2017)
H. gomorrense	Halobaculum	Stenosarchaea (Halobacteria > Haloferacales)	Euryarchaeota Cluster 2	40.0	6.5	11.7	+	ND		NaCl		(Oren et al., 1995)
H. magnesiiphilum	Halobaculum	Stenosarchaea (Halobacteria > Haloferacales)	Euryarchaeota Cluster 2	45.0	6.5	11.7	+	ND		NaCl		(Shimoshige et al., 2013)
H. roseum	Halobaculum	Stenosarchaea (Halobacteria > Haloferacales)	Euryarchaeota Cluster 2	40.0	7.0	20.0	+	ND		B&D + H2O		(Chen et al., 2017b)
H. clavatus	Halobellus	Stenosarchaea (Halobacteria > Haloferacales)	Euryarchaeota Cluster 2	37.0	7.3	15.0	+	ND		NaCl		(Cui et al., 2011c)
H. inordinatus	Halobellus	Stenosarchaea (Halobacteria > Haloferacales)	Euryarchaeota Cluster 2	37.0	8.0	18.1	+	ND		NaCl		(Qiu et al., 2013b)
H. limi	Halobellus	Stenosarchaea (Halobacteria > Haloferacales)	Euryarchaeota Cluster 2	45.0	7.0	19.0	+	ND		NaCl		(Cui et al., 2012b)
H. litoreus	Halobellus	Stenosarchaea (Halobacteria > Haloferacales)	Euryarchaeota Cluster 2	37.0	7.0	18.1	+	ND		NaCl		(Zhao et al., 2014)
H. ramosii	Halobellus	Stenosarchaea (Halobacteria > Haloferacales)	Euryarchaeota Cluster 2	37.0	7.5	20.0	+	ND		NaCl		(Pérez-Davó et al., 2015)
H. rarus	Halobellus	Stenosarchaea (Halobacteria > Haloferacales)	Euryarchaeota Cluster 2	37.0	7.3	15.2	+	ND		NaCl		(Zhang et al., 2013a)
H. rufus	Halobellus	Stenosarchaea (Halobacteria > Haloferacales)	Euryarchaeota Cluster 2	37.0	7.0	15.0	+	ND				(Cha et al., 2014a)
H. salinus	Halobellus	Stenosarchaea (Halobacteria > Haloferacales)	Euryarchaeota Cluster 2	37.0	7.3	20.0	+	ND		NaCl		(Cui et al., 2012b)
H. palmae	Halobium	Stenosarchaea (Halobacteria > Haloferacales)	Euryarchaeota Cluster 2	40.0	7.5	15.2	+	ND		B&D + NaCl + Petroleum ether		(Mori et al., 2016b)
H. salinum	Halobium	Stenosarchaea (Halobacteria > Haloferacales)	Euryarchaeota Cluster 2	37.0	7.5	18.1	+	ND		M+H		(Li et al., 2018)
H. alexandrinus	Haloferax	Stenosarchaea (Halobacteria > Haloferacales)	Euryarchaeota Cluster 2	37.0	7.2	25.0	+	ND		MeOH + Toluene		(Asker and Ohta, 2002)
H. chudinovii	Haloferax	Stenosarchaea (Halobacteria > Haloferacales)	Euryarchaeota Cluster 2	42.0	6.9	17.5	+	ND				(Saralov et al., 2013)
H. denitrificans	Haloferax	Stenosarchaea (Halobacteria > Haloferacales)	Euryarchaeota Cluster 2	37.0	6.7	18.1	+	ND				(Tindall et al., 1989)
H. elongans	Haloferax	Stenosarchaea (Halobacteria > Haloferacales)	Euryarchaeota Cluster 2	53.0	7.4	18.1	+	ND		B&D + NaCl		(Allen et al., 2008)
H. gibbonsii	Haloferax	Stenosarchaea (Halobacteria > Haloferacales)	Euryarchaeota Cluster 2	37.5	6.8	22.5	+	ND				(Juez et al., 1986)
H. larsenii	Haloferax	Stenosarchaea (Halobacteria > Haloferacales)	Euryarchaeota Cluster 2	43.5	6.8	16.3	+	ND				(Xu et al., 2007a)
H. lucentense	Haloferax	Stenosarchaea (Halobacteria > Haloferacales)	Euryarchaeota Cluster 2	37.0	7.5	25.0	+	ND		B&D + NaCl		(Gutierrez et al., 2002)
H. massiliense	Haloferax	Stenosarchaea (Halobacteria > Haloferacales)	Euryarchaeota Cluster 2	37.0	7.0	15.0	+	ND		B&D + H2O		(Khelaifia et al., 2018)
H. mediterranei	Haloferax	Stenosarchaea (Halobacteria > Haloferacales)	Euryarchaeota Cluster 2	35.0	6.5	17.0	+	ND				(Rodriguez-Valera et al., 1983)
H. mucosum	Haloferax	Stenosarchaea (Halobacteria > Haloferacales)	Euryarchaeota Cluster 2	48.0	7.4	18.1	+	ND		B&D + NaCl		(Allen et al., 2008)
H. namakaokahaiae	Haloferax	Stenosarchaea (Halobacteria > Haloferacales)	Euryarchaeota Cluster 2	30.0	7.0	8.8	+	ND		B&D + NaCl		(McDuff et al., 2016)
H. prahovense	Haloferax	Stenosarchaea (Halobacteria > Haloferacales)	Euryarchaeota Cluster 2	43.0	7.3	20.0	+	ND		B&D + NaCl		(Enache et al., 2007)
H. sufurifontis	Haloferax	Stenosarchaea (Halobacteria > Haloferacales)	Euryarchaeota Cluster 2	34.5	6.6	14.0	+	ND				(Elshahed et al., 2004)s
H. volcanii	Haloferax	Stenosarchaea (Halobacteria > Haloferacales)	Euryarchaeota Cluster 2	45.0	7.0	12.2	+	ND		NaCl		(Sprott et al., 2003)
H. borinquense	Halogeometricum	Stenosarchaea (Halobacteria > Haloferacales)	Euryarchaeota Cluster 2	40.0	7.0	22.5	+	ND		NaCl		(Montalvo-Rodriguez et al., 1998)
H. limi	Halogeometricum	Stenosarchaea (Halobacteria > Haloferacales)	Euryarchaeota Cluster 2	37.0	7.0	22.5	+	ND		NaCl		(Qiu et al., 2013a)
H. pallidum	Halogeometricum	Stenosarchaea (Halobacteria > Haloferacales)	Euryarchaeota Cluster 2	30.0	6.5	18.1	+	ND		NaCl		(Qiu et al., 2013a)
H. rufum	Halogeometricum	Stenosarchaea (Halobacteria > Haloferacales)	Euryarchaeota Cluster 2	41.0	7.0	22.5	+	ND		NaCl		(Qiu et al., 2013a)
H. amylolyticum	Halogranum	Stenosarchaea (Halobacteria > Haloferacales)	Euryarchaeota Cluster 2	37.0	6.8	22.0	+	ND		NaCl		(Cui et al., 2011d)
H. gelatinilyticum	Halogranum	Stenosarchaea (Halobacteria > Haloferacales)	Euryarchaeota Cluster 2	37.0	6.8	22.0	+	ND		NaCl		(Cui et al., 2011d)
H. rubrum	Halogranum	Stenosarchaea (Halobacteria > Haloferacales)	Euryarchaeota Cluster 2	37.0	7.5	22.5	+	ND		NaCl		(Cui et al., 2010b)
H. salarium	Halogranum	Stenosarchaea (Halobacteria > Haloferacales)	Euryarchaeota Cluster 2	37.0	7.0	17.5	+	ND		NaCl		(Kim et al., 2011)
H. litchfieldiae	Halohasta	Stenosarchaea (Halobacteria > Haloferacales)	Euryarchaeota Cluster 2	30.0	7.5	18.1	+	ND		B&D + H2O		(Mou et al., 2012)
H. litorea	Halohasta	Stenosarchaea (Halobacteria > Haloferacales)	Euryarchaeota Cluster 2	40.0	7.0	15.0	+	ND		B&D + H2O		(Mou et al., 2012)
H. pelagica	Halolamina	Stenosarchaea (Halobacteria > Haloferacales)	Euryarchaeota Cluster 2	37.0	7.3	21.7	+	ND		NaCl		(Cui et al., 2011a)
H. rubra	Halolamina	Stenosarchaea (Halobacteria > Haloferacales)	Euryarchaeota Cluster 2	37.0	7.0	22.5	+	ND		NaCl		(Cha et al., 2014b)
H. salifodinae	Halolamina	Stenosarchaea (Halobacteria > Haloferacales)	Euryarchaeota Cluster 2	40.0	7.0	21.7	+	ND		NaCl		(Zhang et al., 2013b)
H. salina	Halolamina	Stenosarchaea (Halobacteria > Haloferacales)	Euryarchaeota Cluster 2	37.0	6.5	20.0	+	ND		M+T		(Zhang et al., 2013b)
H. sediminis	Halolamina	Stenosarchaea (Halobacteria > Haloferacales)	Euryarchaeota Cluster 2	38.5	7.5	22.5	+	ND		NaCl+PE		(Koh et al., 2015)
H. pteroides	Halonotius	Stenosarchaea (Halobacteria > Haloferacales)	Euryarchaeota Cluster 2	38.5	7.3	22.0	+	ND		M+T		(Burns et al., 2010a)
H. alkalitolerans	Haloparvum	Stenosarchaea (Halobacteria > Haloferacales)	Euryarchaeota Cluster 2	47.5	7.3	13.7	+	ND		NaCl		(Kondo et al., 2016)
H. sedimenti	Haloparvum	Stenosarchaea (Halobacteria > Haloferacales)	Euryarchaeota Cluster 2	42.0	7.8	17.5	+	ND		NaCl		(Chen et al., 2016a)
H. fulvigenes	Halopelagius	Stenosarchaea (Halobacteria > Haloferacales)	Euryarchaeota Cluster 2	40.0	6.8	22.5	+	ND		NaCl		(Liu et al., 2013a)
H. inordinatus	Halopelagius	Stenosarchaea (Halobacteria > Haloferacales)	Euryarchaeota Cluster 2	37.0	6.8	21.0	+	ND		NaCl		(Cui et al., 2010d)
H. longus	Halopelagius	Stenosarchaea (Halobacteria > Haloferacales)	Euryarchaeota Cluster 2	48.0	7.2	18.9	+	ND		NaCl		(Zhang et al., 2013d)
H. malekzadehii	Halopenitus	Stenosarchaea (Halobacteria > Haloferacales)	Euryarchaeota Cluster 2	40.0	7.5	20.4	+	ND				(Amoozegar et al., 2013)
H. persicus	Halopenitus	Stenosarchaea (Halobacteria > Haloferacales)	Euryarchaeota Cluster 2	40.0	7.5	17.5	+	ND				(Amoozegar et al., 2012)
H. salinus	Halopenitus	Stenosarchaea (Halobacteria > Haloferacales)	Euryarchaeota Cluster 2	37.0	7.0	16.6	+	ND		B&D + H2O		(Han et al., 2014)
H. aerogenes	Haloplanus	Stenosarchaea (Halobacteria > Haloferacales)	Euryarchaeota Cluster 2	38.5	7.5	12.2	+	ND		NaCl		(Cui et al., 2011b)
H. litoreus	Haloplanus	Stenosarchaea (Halobacteria > Haloferacales)	Euryarchaeota Cluster 2	37.0	6.5	20.0	+	ND		NaCl		(Han and Cui, 2014b)
H. natans	Haloplanus	Stenosarchaea (Halobacteria > Haloferacales)	Euryarchaeota Cluster 2	40.0	7.0	17.5	+	ND		NaCl		(Bardavid et al., 2007)
H. rallus	Haloplanus	Stenosarchaea (Halobacteria > Haloferacales)	Euryarchaeota Cluster 2	37.0	7.0	15.0	+	ND		NaCl+PE		(Cho et al., 2018)
H. ruber	Haloplanus	Stenosarchaea (Halobacteria > Haloferacales)	Euryarchaeota Cluster 2	37.0	6.8	18.1	+	ND		NaCl		(Han and Cui, 2014b)
H. salinarum	Haloplanus	Stenosarchaea (Halobacteria > Haloferacales)	Euryarchaeota Cluster 2	37.0	8.0	18.1	+	ND		M+H	TLC+APCI	(Hwang et al., 2017)
H. salinus	Haloplanus	Stenosarchaea (Halobacteria > Haloferacales)	Euryarchaeota Cluster 2	37.0	7.0	18.1	+	ND		B&D + H2O		(Qiu et al., 2013d)
H. vescus	Haloplanus	Stenosarchaea (Halobacteria > Haloferacales)	Euryarchaeota Cluster 2	40.0	6.3	18.1	+	ND		NaCl		(Cui et al., 2010a)
H. halophilus	Haloprofundus	Stenosarchaea (Halobacteria > Haloferacales)	Euryarchaeota Cluster 2	37.0	7.0	12.2	+	ND		NaCl		(Xu et al., 2018)
H. marisrubri	Haloprofundus	Stenosarchaea (Halobacteria > Haloferacales)	Euryarchaeota Cluster 2	34.0	7.3	22.8	+	ND		NaCl		(Zhang et al., 2017)
H. walsbyi	Haloquadratum	Stenosarchaea (Halobacteria > Haloferacales)	Euryarchaeota Cluster 2	45.0	6.8	18.1	+	ND		NaCl		(Burns et al., 2007)
H. aethiopicum	Halorubrum	Stenosarchaea (Halobacteria > Haloferacales)	Euryarchaeota Cluster 2	42.0	7.0	22.5	+	ND		B&D + NaCl		(Gibtan et al., 2018)
H. aidingense	Halorubrum	Stenosarchaea (Halobacteria > Haloferacales)	Euryarchaeota Cluster 2	41.0	7.5	15.2	+	ND		TCA		(Cui et al., 2006a)
H. alkaliphilum	Halorubrum	Stenosarchaea (Halobacteria > Haloferacales)	Euryarchaeota Cluster 2	38.0	9.5	24.0	+	ND	C25	AAB	ESI	(Feng et al., 2005)
H. aquaticum	Halorubrum	Stenosarchaea (Halobacteria > Haloferacales)	Euryarchaeota Cluster 2	38.0	7.5	20.0	+	ND		AAB	ESI	(Gutiérrez et al., 2011)
H. arcis	Halorubrum	Stenosarchaea (Halobacteria > Haloferacales)	Euryarchaeota Cluster 2	42.0	7.5	21.5	+	ND		AAB	ESI	(Xu et al., 2007b)
H. californiense	Halorubrum	Stenosarchaea (Halobacteria > Haloferacales)	Euryarchaeota Cluster 2	37.0	7.3	23.3	+	ND		TCA		(Pesenti et al., 2008)
H. chaoviator	Halorubrum	Stenosarchaea (Halobacteria > Haloferacales)	Euryarchaeota Cluster 2	37.0	7.4	25.0	+	ND		B&D + NaCl		(Mancinelli et al., 2009)
H. cibi	Halorubrum	Stenosarchaea (Halobacteria > Haloferacales)	Euryarchaeota Cluster 2	35.0	7.5	24.0	+	ND		B&D + NaCl		(Roh and Bae, 2009)
H. ejinorense	Halorubrum	Stenosarchaea (Halobacteria > Haloferacales)	Euryarchaeota Cluster 2	37.0	7.5	20.0	+	ND			TLC+FAB	(Castillo et al., 2007b)
H. ezzemoulense	Halorubrum	Stenosarchaea (Halobacteria > Haloferacales)	Euryarchaeota Cluster 2	38.5	7.3	20.0	+	ND		TCA	TLC+FAB	(Kharroub et al., 2006)
H. gandharaense	Halorubrum	Stenosarchaea (Halobacteria > Haloferacales)	Euryarchaeota Cluster 2	45.0	9.3	20.0	+	ND	C25	TCA	TLC+MALDI	(Kondo et al., 2015)
H. halodurans	Halorubrum	Stenosarchaea (Halobacteria > Haloferacales)	Euryarchaeota Cluster 2	37.0	7.0	25.0	+	ND		TCA/AM/+TCA	APCI/ESI	(Corral et al., 2016)
H. halophilum	Halorubrum	Stenosarchaea (Halobacteria > Haloferacales)	Euryarchaeota Cluster 2	38.0	8.0	25.0	+	ND		TCA		(Yim et al., 2014a)
H. kocurii	Halorubrum	Stenosarchaea (Halobacteria > Haloferacales)	Euryarchaeota Cluster 2	37.0	7.5	20.0	+	ND		TCA/AM	FAB/APCI	(Gutierrez et al., 2008)
H. lacusprofundi	Halorubrum	Stenosarchaea (Halobacteria > Haloferacales)	Euryarchaeota Cluster 2	34.0	7.0	17.5	+	ND				(Gibson et al., 2005; Tindall, 1990)
H. laminariae	Halorubrum	Stenosarchaea (Halobacteria > Haloferacales)	Euryarchaeota Cluster 2	30.0	7.0	16.6	+	ND		TCA		(Han and Cui, 2015)
H. lipolyticum	Halorubrum	Stenosarchaea (Halobacteria > Haloferacales)	Euryarchaeota Cluster 2	47.5	7.5	15.0	+	ND		D+H	APCI	(Cui et al., 2006a)
H. litoreum	Halorubrum	Stenosarchaea (Halobacteria > Haloferacales)	Euryarchaeota Cluster 2	40.0	7.3	20.0	+	ND		AM	TLC+HPLC’	(Cui et al., 2007a)
H. luteum	Halorubrum	Stenosarchaea (Halobacteria > Haloferacales)	Euryarchaeota Cluster 2	34.5	9.8	24.2	+	ND		AM	TLC+HPLC’	(Hu et al., 2008)
H. orientale	Halorubrum	Stenosarchaea (Halobacteria > Haloferacales)	Euryarchaeota Cluster 2	40.0	8.0	20.0	+	ND		TCA		(Castillo et al., 2006b)
H. pallidum	Halorubrum	Stenosarchaea (Halobacteria > Haloferacales)	Euryarchaeota Cluster 2	38.0	8.0	20.0	+	ND		D+H	APCI	(Chen et al., 2016b)
H. persicum	Halorubrum	Stenosarchaea (Halobacteria > Haloferacales)	Euryarchaeota Cluster 2	37.0	7.1	20.0	+	ND	C25	TCA		(Corral et al., 2015b)
H. rubrum	Halorubrum	Stenosarchaea (Halobacteria > Haloferacales)	Euryarchaeota Cluster 2	37.0	7.0	12.2	+	ND		TCA	GLC	(Qiu et al., 2013c)
H. rutilum	Halorubrum	Stenosarchaea (Halobacteria > Haloferacales)	Euryarchaeota Cluster 2	37.0	7.0	15.0	+	ND		AM	TLC+HPLC’	(Yin et al., 2015)
H. saccharovorum	Halorubrum	Stenosarchaea (Halobacteria > Haloferacales)	Euryarchaeota Cluster 2	50.0	7.0	22.5	+	ND			ESI	(Tindall, 1990)
H. salinum	Halorubrum	Stenosarchaea (Halobacteria > Haloferacales)	Euryarchaeota Cluster 2	30.0	7.3	12.2	+	ND		AM	APCI+GC	(Zhang and Cui, 2014a)
H. sfaxense	Halorubrum	Stenosarchaea (Halobacteria > Haloferacales)	Euryarchaeota Cluster 2	37.0	7.4	25.0	+	ND		AM	TLC+HPLC’/ESI	(Trigui et al., 2011)
H. sodomense	Halorubrum	Stenosarchaea (Halobacteria > Haloferacales)	Euryarchaeota Cluster 2	40.0	7.0	11.7	+	ND		AM/AM	TLC+HPLC’	(Tindall, 1990; Torreblanca et al., 1986)
H. tebenquichense	Halorubrum	Stenosarchaea (Halobacteria > Haloferacales)	Euryarchaeota Cluster 2	40.0	7.0	30.0	+	ND		TCA		(Lizama et al., 2002)
H. terrestre	Halorubrum	Stenosarchaea (Halobacteria > Haloferacales)	Euryarchaeota Cluster 2	41.0	7.5	25.0	+	ND		TCA		(Ventosa et al., 2004)
H. tibetense	Halorubrum	Stenosarchaea (Halobacteria > Haloferacales)	Euryarchaeota Cluster 2	38.0	9.3	18.8	+	ND	C25	TCA		(Fan et al., 2004)
H. trueperi	Halorubrum	Stenosarchaea (Halobacteria > Haloferacales)	Euryarchaeota Cluster 2	43.0	8.0	20.0	+	ND		TCA/TCA		(Chen et al., 2017a)
H. vacuolatum	Halorubrum	Stenosarchaea (Halobacteria > Haloferacales)	Euryarchaeota Cluster 2	38.0	9.5	20.0	+	ND	C25	AM	TLC+HPLC’	(Mwatha and Grant, 1993)
H. xinjiangense	Halorubrum	Stenosarchaea (Halobacteria > Haloferacales)	Euryarchaeota Cluster 2	40.0	7.3	19.0	+	ND		TCA		(Feng et al., 2004)
H. yunnanense	Halorubrum	Stenosarchaea (Halobacteria > Haloferacales)	Euryarchaeota Cluster 2	43.0	7.5	20.0	+	ND		M+H		(Chen et al., 2015)
S. rubrum	Salinigranum	Stenosarchaea (Halobacteria > Haloferacales)	Euryarchaeota Cluster 2	37.0	7.0	18.1	+	ND		M+H		(Cui and Zhang, 2014)
S. salinum	Salinigranum	Stenosarchaea (Halobacteria > Haloferacales)	Euryarchaeota Cluster 2	37.0	7.5	15.2	+	ND		TCA		(Wang et al., 2016)
H. haloterrestris	Halobiforma	Stenosarchaea (Halobacteria > Natrialbales)	Euryarchaeota Cluster 2	42.0	7.5	20.0	+	ND	C25	AM	TLC+HPLC’	(Hezayen et al., 2002)
H. lacisalsi	Halobiforma	Stenosarchaea (Halobacteria > Natrialbales)	Euryarchaeota Cluster 2	43.5	7.5	20.0	+	ND	C25	TCA		(Xu et al., 2005c)
H. nitratireducens	Halobiforma	Stenosarchaea (Halobacteria > Natrialbales)	Euryarchaeota Cluster 2	38.5	8.5	20.0	+	ND	C25	TCA		(Hezayen et al., 2002; Xin et al., 2001)
H. aswanensis	Halopiger	Stenosarchaea (Halobacteria > Natrialbales)	Euryarchaeota Cluster 2	40.0	7.5	24.0	+	ND	C25	Unpublished		(Hezayen et al., 2010)
H. salifonidae	Halopiger	Stenosarchaea (Halobacteria > Natrialbales)	Euryarchaeota Cluster 2	41.0	7.0	18.1	+	ND	C25	TCA		(Zhang et al., 2013c)
H. thermotolerans	Halopiger	Stenosarchaea (Halobacteria > Natrialbales)	Euryarchaeota Cluster 2	45.0	8.0	15.0	+	ND	C25	TCA		(Minegishi et al., 2016)
H. xanaduensis	Halopiger	Stenosarchaea (Halobacteria > Natrialbales)	Euryarchaeota Cluster 2	37.0	7.8	25.0	+	ND	C25	TCA		(Gutierrez et al., 2007)
H. alkaliphila	Halostagnicola	Stenosarchaea (Halobacteria > Natrialbales)	Euryarchaeota Cluster 2	37.0	8.8	25.0	+	ND	C25		ESI	(Nagaoka et al., 2011)
H. bangensis	Halostagnicola	Stenosarchaea (Halobacteria > Natrialbales)	Euryarchaeota Cluster 2	37.0	9.0	25.0	+	ND	C25	AM		(Corral et al., 2015a)
H. kamekurae	Halostagnicola	Stenosarchaea (Halobacteria > Natrialbales)	Euryarchaeota Cluster 2	30.0	6.8	15.0	+	ND	C25	TCA/TCA		(Nagaoka et al., 2010)
H. larsenii	Halostagnicola	Stenosarchaea (Halobacteria > Natrialbales)	Euryarchaeota Cluster 2	37.0	7.5	20.0	+	ND	C25	AM	APCI+GC	(Castillo et al., 2006c)
H. daqingensis	Haloterrigena	Stenosarchaea (Halobacteria > Natrialbales)	Euryarchaeota Cluster 2	35.0	10.0	13.0	+	ND		AM	TLC+HPLC’	(Wang et al., 2010)
H. hispanica	Haloterrigena	Stenosarchaea (Halobacteria > Natrialbales)	Euryarchaeota Cluster 2	50.0	7.0	20.0	+	ND	C25		TLC+FAB	(Romano et al., 2007)
H. jeotgali	Haloterrigena	Stenosarchaea (Halobacteria > Natrialbales)	Euryarchaeota Cluster 2	41.0	7.3	17.5	+	ND		TCA	TLC+FAB	(Roh et al., 2009)
H. limicola	Haloterrigena	Stenosarchaea (Halobacteria > Natrialbales)	Euryarchaeota Cluster 2	48.0	7.0	18.1	+	ND	C25	PB	ESI	(Cui et al., 2006b)
H. longa	Haloterrigena	Stenosarchaea (Halobacteria > Natrialbales)	Euryarchaeota Cluster 2	43.0	7.3	18.1	+	ND	C25	AM/TCA	TLC+HPLC’/TLC+FAB	(Cui et al., 2006b)
H. mahii	Haloterrigena	Stenosarchaea (Halobacteria > Natrialbales)	Euryarchaeota Cluster 2	50.0	7.3	24.0	+	ND	C25	PB	ESI	(Ding et al., 2017)
H. saccharevitans	Haloterrigena	Stenosarchaea (Halobacteria > Natrialbales)	Euryarchaeota Cluster 2	43.5	7.5	18.1	+	ND	C25	PB	ESI	(Xu et al., 2005a)
H. salina	Haloterrigena	Stenosarchaea (Halobacteria > Natrialbales)	Euryarchaeota Cluster 2	37.0	7.5	20.0	+	ND	C25	AM	TLC+HPLC’	(Gutiérrez et al., 2008)
H. thermotolerans	Haloterrigena	Stenosarchaea (Halobacteria > Natrialbales)	Euryarchaeota Cluster 2	50.0	7.3	19.0	+	ND	C25	PB	ESI	(Montalvo-Rodriguez et al., 2000)
H. turkmenica	Haloterrigena	Stenosarchaea (Halobacteria > Natrialbales)	Euryarchaeota Cluster 2	51.0	7.0	20.0	+	ND	C25	TCA		(Ventosa et al., 1999)
H. luteus	Halovarius	Stenosarchaea (Halobacteria > Natrialbales)	Euryarchaeota Cluster 2	45.0	7.0	23.3	+	ND		AM	APCI	(Mehrshad et al., 2015)
H. asiaticus	Halovivax	Stenosarchaea (Halobacteria > Natrialbales)	Euryarchaeota Cluster 2	37.0	7.3	20.0	+	ND	C25	AM	APCI	(Castillo et al., 2006a)
H. cerinus	Halovivax	Stenosarchaea (Halobacteria > Natrialbales)	Euryarchaeota Cluster 2	40.0	7.0	20.0	+	ND	C25	TCA	FAB+APCI	(Amoozegar et al., 2015)
H. limisalsi	Halovivax	Stenosarchaea (Halobacteria > Natrialbales)	Euryarchaeota Cluster 2	35.0	7.0	25.0	+	ND	C25	M+H		(Amoozegar et al., 2014b)
H. ruber	Halovivax	Stenosarchaea (Halobacteria > Natrialbales)	Euryarchaeota Cluster 2	37.0	7.3	20.0	+	ND	C25	NaCl		(Castillo et al., 2007a)
N. aegyptia	Natrialba	Stenosarchaea (Halobacteria > Natrialbales)	Euryarchaeota Cluster 2	40.0	7.5	16.0	+	ND	C25	NaCl/M+H		(Hezayen et al., 2001)
N. asiatica	Natrialba	Stenosarchaea (Halobacteria > Natrialbales)	Euryarchaeota Cluster 2	35.0	6.8	23.3	+	ND	C25	M+H		(Hezayen et al., 2001)
N. chahannaoensis	Natrialba	Stenosarchaea (Halobacteria > Natrialbales)	Euryarchaeota Cluster 2	45.0	9.0	15.0	+	ND	C25	NaCl		(Xu et al., 2001)n
N. hulunbeirensis	Natrialba	Stenosarchaea (Halobacteria > Natrialbales)	Euryarchaeota Cluster 2	50.0	9.0	20.0	+	ND	C25	NaCl		(Xu et al., 2001)
N. magadii	Natrialba	Stenosarchaea (Halobacteria > Natrialbales)	Euryarchaeota Cluster 2	38.5	9.5	20.0	+	ND	C25	NaCl		(Tindall et al., 1984)
N. taiwanensis	Natrialba	Stenosarchaea (Halobacteria > Natrialbales)	Euryarchaeota Cluster 2	37.5	7.7	20.4	+	ND	C25	NaCl		(Hezayen et al., 2001)
N. breve	Natribaculum	Stenosarchaea (Halobacteria > Natrialbales)	Euryarchaeota Cluster 2	37.0	7.3	15.2	+	ND		NaCl		(Liu et al., 2015)
N. longum	Natribaculum	Stenosarchaea (Halobacteria > Natrialbales)	Euryarchaeota Cluster 2	37.0	7.3	20.0	+	ND		NaCl		(Liu et al., 2015)
N. altunense	Natrinema	Stenosarchaea (Halobacteria > Natrialbales)	Euryarchaeota Cluster 2	41.0	7.4	21.5	+	ND	C25	NaCl		(Xu et al., 2005b)
N. ejinorense	Natrinema	Stenosarchaea (Halobacteria > Natrialbales)	Euryarchaeota Cluster 2	37.0	7.0	20.0	+	ND	C25	NaCl		(Castillo et al., 2006d)
N. gari	Natrinema	Stenosarchaea (Halobacteria > Natrialbales)	Euryarchaeota Cluster 2	38.5	6.3	17.5	+	ND	C25	B&D + NaCl	TLC+GLC+GC	(Tapingkae et al., 2008)
N. pallidum	Natrinema	Stenosarchaea (Halobacteria > Natrialbales)	Euryarchaeota Cluster 2	38.5	7.4	22.5	+	ND	C25	NaCl		(McGenity et al., 1998)
N. pellirubrum	Natrinema	Stenosarchaea (Halobacteria > Natrialbales)	Euryarchaeota Cluster 2	37.0	7.5	22.5	+	ND	C25	NaCl		(McGenity et al., 1998)
N. salaciae	Natrinema	Stenosarchaea (Halobacteria > Natrialbales)	Euryarchaeota Cluster 2	45.0	7.5	17.5	+	ND		NaCl		(Albuquerque et al., 2012)
N. soli	Natrinema	Stenosarchaea (Halobacteria > Natrialbales)	Euryarchaeota Cluster 2	40.0	7.0	23.3	+	ND		NaCl		(Rasooli et al., 2017)
N. versiforme	Natrinema	Stenosarchaea (Halobacteria > Natrialbales)	Euryarchaeota Cluster 2	37.0	7.0	22.5	+	ND	C25	NaCl		(Xin et al., 2000)
N. gregoryi	Natronobacterium	Stenosarchaea (Halobacteria > Natrialbales)	Euryarchaeota Cluster 2	37.0	9.5	17.5	+	ND	C25	NaCl		(Langworthy and Pond, 1986; Tindall et al., 1984)
N. texcoconense	Natronobacterium	Stenosarchaea (Halobacteria > Natrialbales)	Euryarchaeota Cluster 2	37.0	8.0	17.5	+	ND		NaCl		(Ruiz-Romero et al., 2013a)
N. cellulositropha	Natronobiforma	Stenosarchaea (Halobacteria > Natrialbales)	Euryarchaeota Cluster 2	40.0	8.8	23.3	+	ND	C25	NaCl		(Sorokin et al., 2018a)
N. amylolyticus	Natronococcus	Stenosarchaea (Halobacteria > Natrialbales)	Euryarchaeota Cluster 2	42.5	9.0	17.5	+	ND	C25			(Kanai et al., 1995)
N. jeotgali	Natronococcus	Stenosarchaea (Halobacteria > Natrialbales)	Euryarchaeota Cluster 2	40.0	7.5	24.0	+	ND		NaCl		(Roh et al., 2007a)
N. roseus	Natronococcus	Stenosarchaea (Halobacteria > Natrialbales)	Euryarchaeota Cluster 2	40.0	9.3	27.5	+	ND	C25	B&D + NaCl		(Corral et al., 2013)
N. aegyptiacus	Natronolimnobius	Stenosarchaea (Halobacteria > Natrialbales)	Euryarchaeota Cluster 2	52.0	9.3	22.8	+	ND				(Zhao et al., 2018)
N. baerhuensis	Natronolimnobius	Stenosarchaea (Halobacteria > Natrialbales)	Euryarchaeota Cluster 2	37.0	9.0	22.5	+	ND	C25	NaCl		(Itoh et al., 2005)
N. innermongolicus	Natronolimnobius	Stenosarchaea (Halobacteria > Natrialbales)	Euryarchaeota Cluster 2	40.0	9.5	17.5	+	ND	C25	B&D + NaCl		(Itoh et al., 2005)
N. aibiense	Natronorubrum	Stenosarchaea (Halobacteria > Natrialbales)	Euryarchaeota Cluster 2	45.0	8.0	18.1	+	ND	C25	B&D + NaCl		(Cui, 2006)
N. bangense	Natronorubrum	Stenosarchaea (Halobacteria > Natrialbales)	Euryarchaeota Cluster 2	45.0	9.3	22.5	+	ND	C25	MeOH + Toluene		(Cui, 2006; Xu et al., 1999)
N. sediminis	Natronorubrum	Stenosarchaea (Halobacteria > Natrialbales)	Euryarchaeota Cluster 2	37.0	9.0	20.0	+	ND	C25	B&D + NaCl		(Gutiérrez et al., 2010)
N. sulfidifaciens	Natronorubrum	Stenosarchaea (Halobacteria > Natrialbales)	Euryarchaeota Cluster 2	45.0	9.0	18.1	+	ND		NaCl		(Cui et al., 2007b)
N. texcoconense	Natronorubrum	Stenosarchaea (Halobacteria > Natrialbales)	Euryarchaeota Cluster 2	37.0	9.0	20.0	+	ND				(Ruiz-Romero et al., 2013b)
N. tibetense	Natronorubrum	Stenosarchaea (Halobacteria > Natrialbales)	Euryarchaeota Cluster 2	45.0	9.3	20.0	+	ND	C25	MeOH + Toluene		(Cui, 2006; Xu et al., 1999)
S. chitinilyticum	Salinarchaeum	Stenosarchaea (Halobacteria > Natrialbales)	Euryarchaeota Cluster 2	40.0	7.0	16.6	+	ND				(Minegishi et al., 2017)
S. laminariae	Salinarchaeum	Stenosarchaea (Halobacteria > Natrialbales)	Euryarchaeota Cluster 2	37.0	8.3	21.5	+	ND		NaCl		(Cui et al., 2011e)
S. infecundisoli	Saliphagus	Stenosarchaea (Halobacteria > Natrialbales)	Euryarchaeota Cluster 2	37.0	7.2	20.0	+	ND		NaCl		(Yin et al., 2017)
M. alkaliphilus	Methanocalculus	Stenosarchaea (Methanomicrobia > Methanomicrobiales)	Euryarchaeota Cluster 2	35.0	9.5	3.5	50.0	50.0		NaCl		(Sorokin et al., 2015)
M. bavaricum	Methanocorpusculum	Stenosarchaea (Methanomicrobia > Methanomicrobiales)	Euryarchaeota Cluster 2	37.0	7.0	0	+	+		NaCl		(Zellner et al., 1989b)
M. parvum	Methanocorpusculum	Stenosarchaea (Methanomicrobia > Methanomicrobiales)	Euryarchaeota Cluster 2	37.0	7.0	2.3	+	+		NaCl		(Koga et al., 1998; Zellner et al., 1989b)
M. sinense	Methanocorpusculum	Stenosarchaea (Methanomicrobia > Methanomicrobiales)	Euryarchaeota Cluster 2	30.0	7.0	0	+	+		NaCl		(Zellner et al., 1989b)
M. bourgense	Methanoculleus	Stenosarchaea (Methanomicrobia > Methanomicrobiales)	Euryarchaeota Cluster 2	37.0	6.7	0.5	+	+		B&D + TCA/TCA		(Blotevogel et al., 1991; Koga et al., 1993)
M. chikugoensis	Methanoculleus	Stenosarchaea (Methanomicrobia > Methanomicrobiales)	Euryarchaeota Cluster 2	27.5	7.0	0.6	+	+		NaCl		(Dianou et al., 2001)
M. marisnigri	Methanoculleus	Stenosarchaea (Methanomicrobia > Methanomicrobiales)	Euryarchaeota Cluster 2	40.0	7.5	1.2	+	+		AM		(Grant et al., 1985)
M. liminatans	Methanofollis	Stenosarchaea (Methanomicrobia > Methanomicrobiales)	Euryarchaeota Cluster 2	40.0	7.0	1.8	+	+		NaCl		(Zellner et al., 1999)
M. tationis	Methanofollis	Stenosarchaea (Methanomicrobia > Methanomicrobiales)	Euryarchaeota Cluster 2	42.5	7.0	1.0	+	+			APCI	(Zellner et al., 1999)
M. cariaci	Methanogenium	Stenosarchaea (Methanomicrobia > Methanomicrobiales)	Euryarchaeota Cluster 2	37.0	7.0	0.1	+	+		NaCl+PE		(Grant et al., 1985)
M. paynteri	Methanolacinia	Stenosarchaea (Methanomicrobia > Methanomicrobiales)	Euryarchaeota Cluster 2	40.0	7.0	0.9	+	+		NaCl		(Koga et al., 1987; Zellner et al., 1989a)
M. mobile	Methanomicrobium	Stenosarchaea (Methanomicrobia > Methanomicrobiales)	Euryarchaeota Cluster 2	40.0	6.5	0.1	+	+		NaCl		(Grant et al., 1985)
M. limicola	Methanoplanus	Stenosarchaea (Methanomicrobia > Methanomicrobiales)	Euryarchaeota Cluster 2	40.0	7	1.0	+	+		TCA		(Koga et al., 1998)
M. boonei	Methanoregula	Stenosarchaea (Methanomicrobia > Methanomicrobiales)	Euryarchaeota Cluster 2	35.0	5.1	0	4.0	96.0		NaCl		(Bräuer et al., 2011)
M. hungatei	Methanospirillum	Stenosarchaea (Methanomicrobia > Methanomicrobiales)	Euryarchaeota Cluster 2	41.0	8.0	0	+	+		NaCl		(Koga et al., 1993; Sprott et al., 1994)
M. burtonii	Methanococcoides	Stenosarchaea (Methanomicrobia > Methanosarcinales)	Euryarchaeota Cluster 2	23.0	7.7	1.2	+	ND	unsDGD, OH-DGD	NaCl		(Koga et al., 1998; Nichols et al., 2004)
M. methylutense	Methanococcoides	Stenosarchaea (Methanomicrobia > Methanosarcinales)	Euryarchaeota Cluster 2	32.5	7.3	2.3	+	ND	OH-DGD	TCA/AM		(Koga et al., 1998; Sowers and Ferry, 1983)
M. evestigatum	Methanohalobium	Stenosarchaea (Methanomicrobia > Methanosarcinales)	Euryarchaeota Cluster 2	50.0	7.0	25.0	+	+	M-DGD	TCA		(Koga et al., 1998)
M. mahii	Methanohalophilus	Stenosarchaea (Methanomicrobia > Methanosarcinales)	Euryarchaeota Cluster 2	37.0	7.5	11.7	+	ND	OH-DGD	M+T		(Koga et al., 1993)
M. bombayensis	Methanolobus	Stenosarchaea (Methanomicrobia > Methanosarcinales)	Euryarchaeota Cluster 2	37.0	7.2	3.0	+	Traces		NaCl		(Schouten et al., 2007)
M. tindarius	Methanolobus	Stenosarchaea (Methanomicrobia > Methanosarcinales)	Euryarchaeota Cluster 2	37.0	6.5	3.0	+	+	C25			(Grant et al., 1985; Koga et al., 1993)
M. concilii	Methanosaeta (Methanothrix)	Stenosarchaea (Methanomicrobia > Methanosarcinales)	Euryarchaeota Cluster 2	35.0	7.2	0	70.0	ND	OH-DGD	NaCl		(Choquet et al., 1992; Ferrante et al., 1989; Langworthy and Pond, 1986; Patell and Sprott, 1990)
M. thermophila	Methanosaeta (Methanothrix)	Stenosarchaea (Methanomicrobia > Methanosarcinales)	Euryarchaeota Cluster 2	60.0	7.0	0	+	+		M+T		(Kamagata et al., 1992; Koga et al., 1993)
M. natronophilum	Methanosalsum	Stenosarchaea (Methanomicrobia > Methanosarcinales)	Euryarchaeota Cluster 2	35.0	9.5	11.7	37.5	50.0	OH-DGD, M-DGD			(Sorokin et al., 2015)
M. zhilinae	Methanosalsum	Stenosarchaea (Methanomicrobia > Methanosarcinales)	Euryarchaeota Cluster 2	45.0	9.2	4.1	+	+	OH-DGD	AM/AM	APCI	(Koga et al., 1998)
M. acetivorans	Methanosarcina	Stenosarchaea (Methanomicrobia > Methanosarcinales)	Euryarchaeota Cluster 2	37.5	6.8	1.2	+	ND	OH-DGD	AM	APCI	(Sprott et al., 1994)
M. barkeri	Methanosarcina	Stenosarchaea (Methanomicrobia > Methanosarcinales)	Euryarchaeota Cluster 2	37.0	6.8	2.3	+	+	OH-DGD, C25	AM	APCI	(De Rosa et al., 1986; Koga et al., 1987, 1993; Sprott et al., 1994)
M. horonobensis	Methanosarcina	Stenosarchaea (Methanomicrobia > Methanosarcinales)	Euryarchaeota Cluster 2	37.0	7.2	0.6	+	Traces	OH-DGD, diOH-DGD	AM	SFC/APCI	(Ganzert et al., 2014)
M. mazei	Methanosarcina	Stenosarchaea (Methanomicrobia > Methanosarcinales)	Euryarchaeota Cluster 2	40.0	7.2	0.1	43.0	Traces	OH-DGD, C25	AM	APCI	(Choquet et al., 1992; Koga et al., 1998; Sprott et al., 1994)
M. soligelidi	Methanosarcina	Stenosarchaea (Methanomicrobia > Methanosarcinales)	Euryarchaeota Cluster 2	28.0	7.8	0	+	ND		AAB/AM	FAB/APCI	(Wagner et al., 2013)
M. spelaei	Methanosarcina	Stenosarchaea (Methanomicrobia > Methanosarcinales)	Euryarchaeota Cluster 2	33.0	6.5	0.3	+	ND	OH-DGD, diOH-DGD	AM	APCI	(Ganzert et al., 2014)
M. thermophila	Methanosarcina	Stenosarchaea (Methanomicrobia > Methanosarcinales)	Euryarchaeota Cluster 2	50.0	6.5	0	+	ND		AM/AAB/AM	APCI	(Koga et al., 1998)
M. vacuolata	Methanosarcina	Stenosarchaea (Methanomicrobia > Methanosarcinales)	Euryarchaeota Cluster 2	38.5	7.5	0.6	+	ND	OH-DGD, diOH-DGD	AM	APCI	(Ganzert et al., 2014)
A. aceticus	Acidilobus	Crenarchaeota (Acidilobales)	Proteoarchaeota	85.0	3.8	0	NA	+		PB	APCI	(Pearson et al., 2008)
A. saccharovorans	Acidilobus	Crenarchaeota (Acidilobales)	Proteoarchaeota	82.5	3.8	0	NA	+		PB/PB	APCI	(Pearson et al., 2008; Prokofeva et al., 2009)
A. sulfuricrescens	Acidilobus	Crenarchaeota (Acidilobales)	Proteoarchaeota	81.0	3.0	0	NA	+		PB	APCI	(Boyd et al., 2007)
C. draconis	Caldisphaera	Crenarchaeota (Acidilobales)	Proteoarchaeota	71.0	2.8	0	NA	+		PB	APCI	(Boyd et al., 2007)
C. lagunensis	Caldisphaera	Crenarchaeota (Acidilobales)	Proteoarchaeota	72.5	3.8	0	NA	+				(Itoh et al., 2003)
A. pernix	Aeropyrum	Crenarchaeota (Desulfurococcales)	Proteoarchaeota	92.5	7.0	3.5	ND	ND	diC25			(Morii et al., 1999; Sako et al., 1996)
D. amylolyticus	Desulfurococcus	Crenarchaeota (Desulfurococcales)	Proteoarchaeota	85.0	6.5	0	NA	+		PB	APCI	(Pearson et al., 2008)
D. mobilis	Desulfurococcus	Crenarchaeota (Desulfurococcales)	Proteoarchaeota	85.0	5.8	0	Traces	100.0		PB	APCI	(Lanzotti et al., 1987; Pearson et al., 2008)
H. butylicus	Hyperthermus	Crenarchaeota (Desulfurococcales)	Proteoarchaeota	95.0	7.0	1.7	15.0	85.0		M+H		(Zillig et al., 1990)
I. hospitalis	Ignicoccus	Crenarchaeota (Desulfurococcales)	Proteoarchaeota	90.0	5.5	1.4	80.7	19.3				(Jahn et al., 2004)
I. islandicus	Ignicoccus	Crenarchaeota (Desulfurococcales)	Proteoarchaeota	90.0	5.8	2.0	50.0	50.0			ESI	(Huber et al., 2000)
I. pacificus	Ignicoccus	Crenarchaeota (Desulfurococcales)	Proteoarchaeota	90.0	6.0	2.0	+	+			ESI	(Huber et al., 2000)
I. aggregans	Ignisphaera	Crenarchaeota (Desulfurococcales)	Proteoarchaeota	93.5	6.4	0	Traces	61.0	GMGT		ESI	(Knappy et al., 2011)
P. abyssi	Pyrodictium	Crenarchaeota (Desulfurococcales)	Proteoarchaeota	97.0	5.5	0.7	+	+	GDNT	PB	APCI	(Pley et al., 1991)
P. occultum	Pyrodictium	Crenarchaeota (Desulfurococcales)	Proteoarchaeota	105.0	5.5	1.5	20.0	80.0				(Langworthy and Pond, 1986; Pley et al., 1991)
P. fumarii	Pyrolobus	Crenarchaeota (Desulfurococcales)	Proteoarchaeota	106.0	5.5	1.7	Traces	+			ESI	(Blöchl et al., 1997)
S. marinus	Staphylothermus	Crenarchaeota (Desulfurococcales)	Proteoarchaeota	92.0	6.5	1.5	20.0	40.0	GDNT	AM	APCI	(Fiala et al., 1986)
S. zilligii	Sulfophobococcus	Crenarchaeota (Desulfurococcales)	Proteoarchaeota	87.0	7.6	0	ND	+		MeOH + Hexane		(Hensel et al., 1997)
T. calderae	Thermogladius	Crenarchaeota (Desulfurococcales)	Proteoarchaeota	84.0	7.1	0	ND	89.0	M-DGD	AM		(Kochetkova et al., 2016)
T. aggregans	Thermosphaera	Crenarchaeota (Desulfurococcales)	Proteoarchaeota	85.0	6.5	0	Traces	+				(Huber et al., 1998)
Z. tikiterensis	Zestosphaera	Crenarchaeota (Desulfurococcales)	Proteoarchaeota	82.5	6.0	0.3	NA	+			TLC+GC	(St. John et al., 2019)
F. fontis	Fervidicoccus	Crenarchaeota (Fervidicoccales)	Proteoarchaeota	67.5	5.8	0	3.0	97.0		PB	APCI	(Perevalova et al., 2010)
A. ambivalens	Acidianus	Crenarchaeota (Sulfolobales)	Proteoarchaeota	80.0	2.5	0	Traces	+	GDNT		ESI	(Trincone et al., 1989)
A. brierleyi	Acidianus	Crenarchaeota (Sulfolobales)	Proteoarchaeota	70.0	1.8	0	10.0	90.0	GDNT	AM		(Langworthy and Pond, 1986)
A. sulfidivorans	Acidianus	Crenarchaeota (Sulfolobales)	Proteoarchaeota	74.0	1.1	0	NA	+	GDNT		GC	(Plumb et al., 2007)
M. hakonensis	Metallosphaera	Crenarchaeota (Sulfolobales)	Proteoarchaeota	70.0	3.0	0	NA	+	GDNT			(Takayanagi et al., 1996)
M. prunae	Metallosphaera	Crenarchaeota (Sulfolobales)	Proteoarchaeota	75.0	3.0	0	Traces	70.0	GDNT	AM		(Itoh et al., 2001)
M. sedula	Metallosphaera	Crenarchaeota (Sulfolobales)	Proteoarchaeota	75.0	3.0	0	Traces	50.0	GDNT	AM/PB	TLC+ESI/APCI	(Itoh et al., 2001; Pearson et al., 2008; Trincone et al., 1992)
M. tengchongensis	Metallosphaera	Crenarchaeota (Sulfolobales)	Proteoarchaeota	70.0	3.5	0.5	NA	+	GDNT			(Peng et al., 2015)
S. shibatae	Saccharolobus	Crenarchaeota (Sulfolobales)	Proteoarchaeota	81.0	3.0	0	1.0	+	GDNT, GTGT	PB+TCA/AM	ESI	(Liu et al., 2018; Sturt et al., 2004)
S. solfataricus	Saccharolobus	Crenarchaeota (Sulfolobales)	Proteoarchaeota	80.0	3.0	0	Traces	+	GDNT, GTGT	PB	ESI	(De Rosa et al., 1983; Pearson et al., 2008; Trincone et al., 1992)
S. azoricus	Stygiolobus	Crenarchaeota (Sulfolobales)	Proteoarchaeota	80.0	2.5	0	NA	+	GTGT		APCI	(Segerer et al., 1991)
S. acidiphilus	Sulfodiicoccus	Crenarchaeota (Sulfolobales)	Proteoarchaeota	68.0	3.0	1.0	Traces	+	GDNT	AAB		(Sakai and Kurosawa, 2017)
S. acidocaldarius	Sulfolobus	Crenarchaeota (Sulfolobales)	Proteoarchaeota	80.0	3.0	0	Traces	+	GDNT	AM	FAB/ESI	(Langworthy and Pond, 1986; Sprott et al., 1997; Zeng et al., 2018)
S. islandicus	Sulfolobus	Crenarchaeota (Sulfolobales)	Proteoarchaeota	75.0	3.0	0	15.0	85.0			FTMS	(Jensen et al., 2015)
S. metallicus	Sulfolobus	Crenarchaeota (Sulfolobales)	Proteoarchaeota	65.0	3.0	0.3	NA	ND	GDNT			(Huber and Stetter, 1991)
S. tengchongensis	Sulfolobus	Crenarchaeota (Sulfolobales)	Proteoarchaeota	85.0	3.5	0	NA	+	GDNT	B&D + H2O		(Erdmann et al., 2014)
S. yangmingensis	Sulfolobus	Crenarchaeota (Sulfolobales)	Proteoarchaeota	80.0	4.0	0	NA	+	GDNT			(Jan et al., 1999)
S. hwakuensis	Sulfurisphaera	Crenarchaeota (Sulfolobales)	Proteoarchaeota	85.0	2.0	0	+	+	GDNT	AAB		(Tsuboi et al., 2018)
S. javensis	Sulfurisphaera	Crenarchaeota (Sulfolobales)	Proteoarchaeota	83.0	3.8	0.5	+	+	GDNT	AAB		(Tsuboi et al., 2018)
S. tokodaii	Sulfurisphaera	Crenarchaeota (Sulfolobales)	Proteoarchaeota	80.0	2.8	0	16.0	84.0			FTMS	(Jensen et al., 2015; Tsuboi et al., 2018)
C. maquilingensis	Caldivirga	Crenarchaeota (Thermoproteales)	Proteoarchaeota	85.0	3.9	0	Traces	+				(Itoh et al., 1999)
P. aerophilum	Pyrobaculum	Crenarchaeota (Thermoproteales)	Proteoarchaeota	100.0	7.0	1.5	Traces	+			TLC+ESI	(Völkl et al., 1993)
P. islandicum	Pyrobaculum	Crenarchaeota (Thermoproteales)	Proteoarchaeota	100.0	6.0	0	Traces	+		AM		(Trincone et al., 1992)
P. neutrophilum	Pyrobaculum	Crenarchaeota (Thermoproteales)	Proteoarchaeota	85.0	6.8	0	37.5	62.5			TLC+ESI	(Langworthy and Pond, 1986)
P. organotrophum	Pyrobaculum	Crenarchaeota (Thermoproteales)	Proteoarchaeota	102.0	6.0	0	Traces	+		AM		(Trincone et al., 1992)
T. modestius	Thermocladium	Crenarchaeota (Thermoproteales)	Proteoarchaeota	75.0	4.0	1.0	+	+			ESI	(Itoh et al., 1998)
T. pendens	Thermofilum	Crenarchaeota (Thermoproteales)	Proteoarchaeota	87.5	5.5	0	+	+				(Zillig et al., 1983)
T. tenax	Thermoproteus	Crenarchaeota (Thermoproteales)	Proteoarchaeota	86.0	5.6	0	5.0	95.0		B&D/B&D + H2O	TLC+ESI	(Thurl and Schäfer, 1988; Trincone et al., 1992)
T. uzoniensis	Thermoproteus	Crenarchaeota (Thermoproteales)	Proteoarchaeota	90.0	5.6	0	NA	+		PB	APCI	(Pearson et al., 2008)
V. distributa	Vulcanisaeta	Crenarchaeota (Thermoproteales)	Proteoarchaeota	87.5	4.3	1.0	Traces	+				(Itoh et al., 2002)
V. moutnovskia	Vulcanisaeta	Crenarchaeota (Thermoproteales)	Proteoarchaeota	87.5	5.3	0	NA	+		PB	APCI	(Pearson et al., 2008)
V. souniana	Vulcanisaeta	Crenarchaeota (Thermoproteales)	Proteoarchaeota	87.5	4.3	1.3	Traces	+				(Itoh et al., 2002)
N. yellowstonii (C)	Nitrosocaldus (C)	Thaumarchaeota (Nitrosocaldales (C))	Proteoarchaeota	68.0	7.0	0.1	7.0	6.0	Cren, GTGT		ESI	(Elling et al., 2017)
N. koreense	Nitrosoarchaeum	Thaumarchaeota (Nitrosopumilales)	Proteoarchaeota	25.0	6.8	0.3	NA	+	Cren		ESI	(Jung et al., 2018)
N. adriaticus (C)	Nitrosopumilus	Thaumarchaeota (Nitrosopumilales)	Proteoarchaeota	31.0	7.1	2.5	18.0	46.0	Cren, GTGT		ESI	(Elling et al., 2017)
N. cobalaminigenes	Nitrosopumilus	Thaumarchaeota (Nitrosopumilales)	Proteoarchaeota	25.0	7.3	3.2	NA	+	Cren		ESI	(Jung et al., 2018)
N. maritimus	Nitrosopumilus	Thaumarchaeota (Nitrosopumilales)	Proteoarchaeota	32.0	7.0	3.1	2.0	63.0	Cren, GTGT		ESI	(Elling et al., 2017)
N. oxyclinae	Nitrosopumilus	Thaumarchaeota (Nitrosopumilales)	Proteoarchaeota	25.0	7.3	2.5	NA	+	Cren		ESI	(Jung et al., 2018)
N. piranensis (C)	Nitrosopumilus	Thaumarchaeota (Nitrosopumilales)	Proteoarchaeota	25.0	7.1	2.8	8.0	68.0	Cren, GTGT		ESI	(Elling et al., 2017)
N. ureiphilus	Nitrosopumilus	Thaumarchaeota (Nitrosopumilales)	Proteoarchaeota	26.0	6.8	2.5	NA	+	Cren		ESI	(Jung et al., 2018)
N. oleophilus (C)	Nitrosocosmicus (C)	Thaumarchaeota (Nitrososphaerales)	Proteoarchaeota	30.0	6.8	3.0	NA	+	Cren	Unpublished		(Jung et al., 2016)
N. gargensis (C)	Nitrososphaera	Thaumarchaeota (Nitrososphaerales)	Proteoarchaeota	35.0	7.8	0.1	Traces	7.0	Cren, GTGT		ESI	(Elling et al., 2017)
N. viennensis	Nitrososphaera	Thaumarchaeota (Nitrososphaerales)	Proteoarchaeota	42.0	7.5	0.1	3.0	49.0	Cren		ESI	(Elling et al., 2017)
N. devanaterra	Nitrosotalea	Thaumarchaeota (Unclassified)	Proteoarchaeota	25.0	4.5	0.1	21.0	43.0	Cren, GTGT		ESI	(Elling et al., 2017)
N. chungbukensis	Nitrosotenuis (C)	Thaumarchaeota (Unclassified)	Proteoarchaeota	30.0	7.3	0	NA	+	Cren		ESI	(Jung et al., 2014)
Major archaeal phyla with isolated representatives were indicated. (C) indicates candidate species or orders. Species were alphabetically sorted by phylum, order, genus and species name.				Optimal growth conditions were gathered from the description paper of the respective species. References were not indicated. Temp, temperature.			Lipid proportions were indicated when available. NA, not analyzed; ND, not detected; +, detected but no available proportions; Traces, detected in trace amounts (<5%); DGD: diphytanyl glycerol diethers (C20); C25, O-sesterterpanyl-O-phytanyl glycerol diethers; diC25, disesterterpanyl glycerol diethers; M-DGD; macrocyclic DGD; OH-DGD, hydroxylated DGD; diOH-DGD, dihydroxylated DGD; unsDGD, unsatur…			Extraction methods were indicated when distinct from the classic Bligh and Dyer (B&D) procedure, e.g. using methanol (MeOH), dichloromethane (DCM) and water (H2O). AAB, B&D with alkaline ammonia buffer; AM, acid methanolysis; D+H, DCM and hexane; M+H, MeOH and hexane; M+T, MeOH and toluene; NaCl, B&D with salted H2O; PE, petroleum ether; TCA, B&D with trichloroacetic acid.	Analysis methods were indicated when different from thin layer chromatography (TLC). APCI, atmospheric pressure chemical ionization high-performance liquid chromatography (HPLC) coupled with mass spectrometry (MS); ESI, electrospray ionization HPLC-MS; FAB, fast atom bombardment MS; FTMS, Fourier transform MS; GC, gas chromatography MS; GLC, gas-liquid chromatography; HPLC’, high-pressure liquid …	References are listed in S1 Text
