# Supplementary material for: Functionalized Membrane Domains: An Ancestral Feature of Archaea?
Source: Front Microbiol. 2020 Mar 31;11:526. doi: 10.3389/fmicb.2020.00526 (PMC7137397; doi:10.3389/fmicb.2020.00526)
Supplement: Supplementary file 4 [file Table_3.xlsx]

## Sheet: Feuil1
	Diethers				Tetraethers
	DGD	M-DGD	C25	diC25	GDGT-0	GDGT-1	GDGT-2	GDGT-3	GDGT-4	GDGT-5	GDGT-6	GMGT-0	GMGT-1	GTGT-0
Methanocaldococcus jannaschii	43.53 ± 11.59	42.09 ± 14.70	ND	ND	13.71 ± 3.28	ND	ND	ND	ND	ND	ND	ND	ND	Traces
Methanothermobacter thermautotrophicus	7.69	ND	ND	ND	89.77	ND	ND	ND	ND	ND	ND	1.52	ND	1.02
Natronomonas pharaonis	20.71 ± 4.94	ND	79.29 ± 4.94	ND	ND	ND	ND	ND	ND	ND	ND	ND	ND	ND
Halobacterium salinarum	100 ± 0	ND	ND	ND	ND	ND	ND	ND	ND	ND	ND	ND	ND	ND
Haloferax volcanii	100 ± 0	ND	ND	ND	ND	ND	ND	ND	ND	ND	ND	ND	ND	ND
Aciduliprofundum boonei	1.86 ± 0.68	ND	ND	ND	81.74 ± 3.18	1.85 ± 0.22	Traces	Traces	Traces	ND	ND	13.37 ± 3.17	Traces	Traces
Pyrobaculum islandicum	5.27 ± 3.70	ND	ND	ND	26.37 ± 1.16	24.71 ± 3.92	23.76 ± 1.97	16.33 ± 0.33	3.45 ± 0.07	ND	ND	ND	ND	Traces
Aeropyrum pernix	Traces	ND	2.71 ± 0.36	97.07 ± 0.27	ND	ND	ND	ND	ND	ND	ND	ND	ND	ND
Sulfolobus acidocaldarius	11.22 ± 13.07	ND	ND	ND	Traces	1.24 ± 0.46	3.28 ± 0.24	14.40 ± 0.40	43.27 ± 5.31	23.42 ± 4.66	2.65 ± 1.48	ND	ND	Traces
Strains were sorted phylogenetically (refer to Table S2)	DGD: diphytanyl glycerol diethers (C20); M-DGD; macrocyclic DGD; C25, O-sesterterpanyl-O-phytanyl glycerol diethers; diC25, disesterterpanyl glycerol diethers; GDGT-0 to 6, glycerol dibiphytanyl glycerol tetraethers with 0 to 6 cyclopentane rings; GMGT-0 to 1, glycerol monoalkyl glycerol tetraethers with 0 to 1 cyclopentane rings; GTGT-0, glycerol trialkyl glycerol tetraethers with no cyclopentan…
All analyses were performed on three independant biological replicates except for M. thermautotrophicus which lipid content was assessed only once
